# Supplementary material
Source: MDPI journal article supplement (https://www.mdpi.com/2225-1154/11/12/242)
Supplement: s1 [file s1]

**Title: Multi-hazard extreme scenarios quantification using intensity, duration and return period characteristics**

Sfetsos Athanasios<sup>1</sup>, Politi Nadia<sup>1</sup> and Vlachogiannis Diamando<sup>1</sup>

<sup>1</sup>Environmental Research Laboratory, INRaSTES, NCSR “Demokritos”, 15341 Agia Paraskevi, Greece

**Case study of Alexandroupolis**

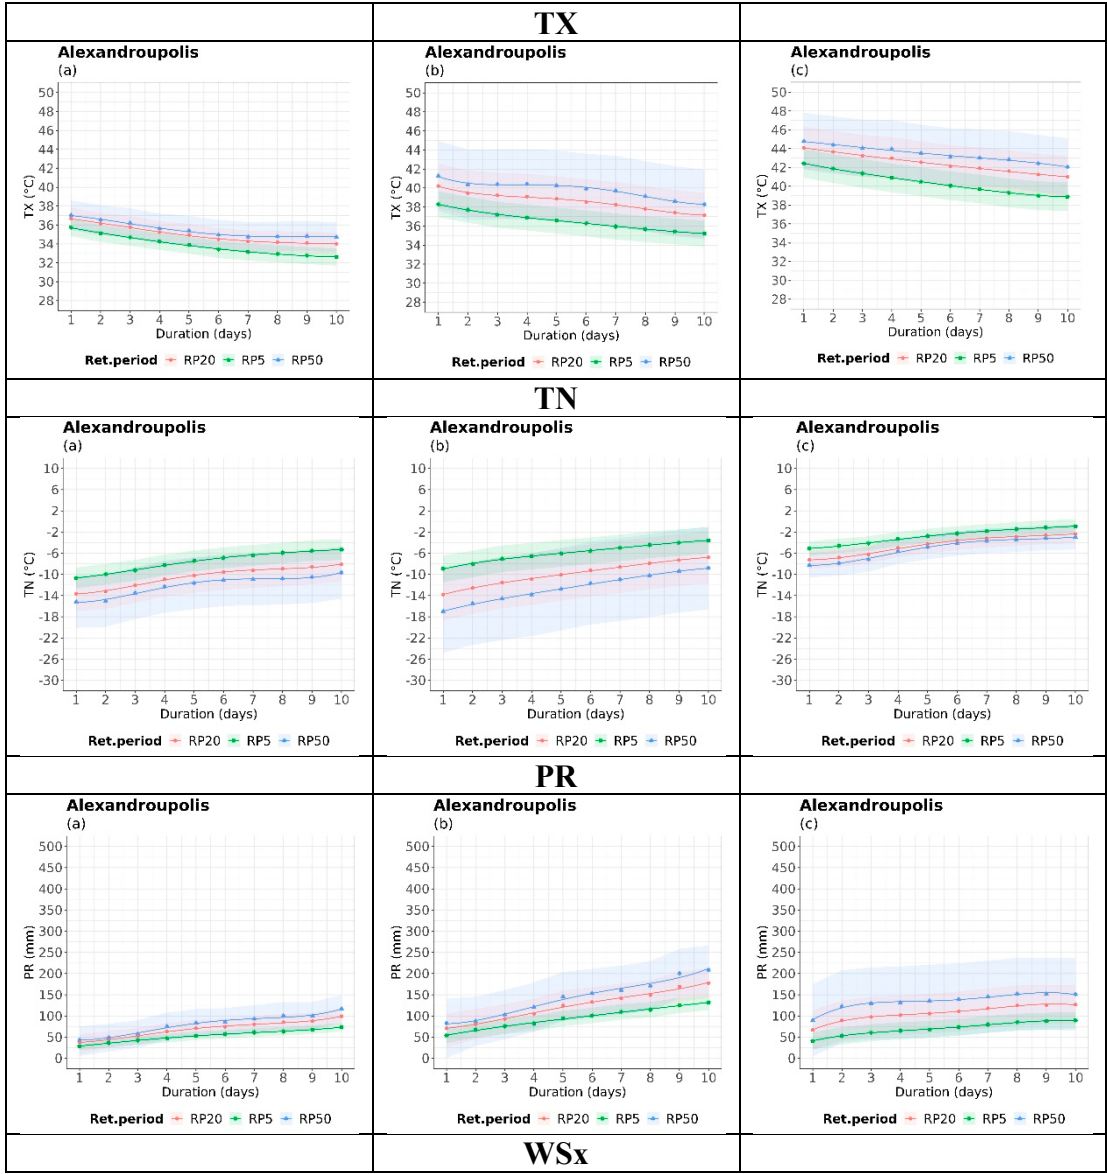

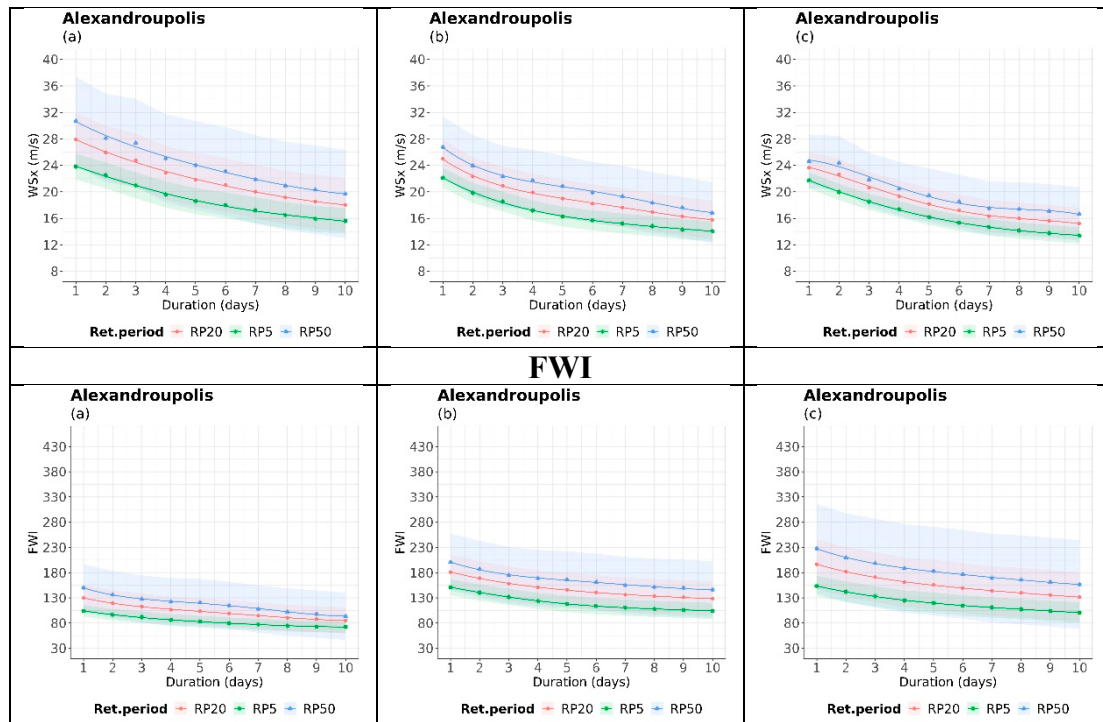

Figure S.1 Intensity-duration return period curves of the examined variables for 5,20 and 50 return periods, during a) the historical period (1980-2004), b) near future period (2025-2049) and c) far future (2075-2099) for Alexandroupolis. The colored areas illustrate the 99% confidence intervals for each return period.

Case study of Corfu

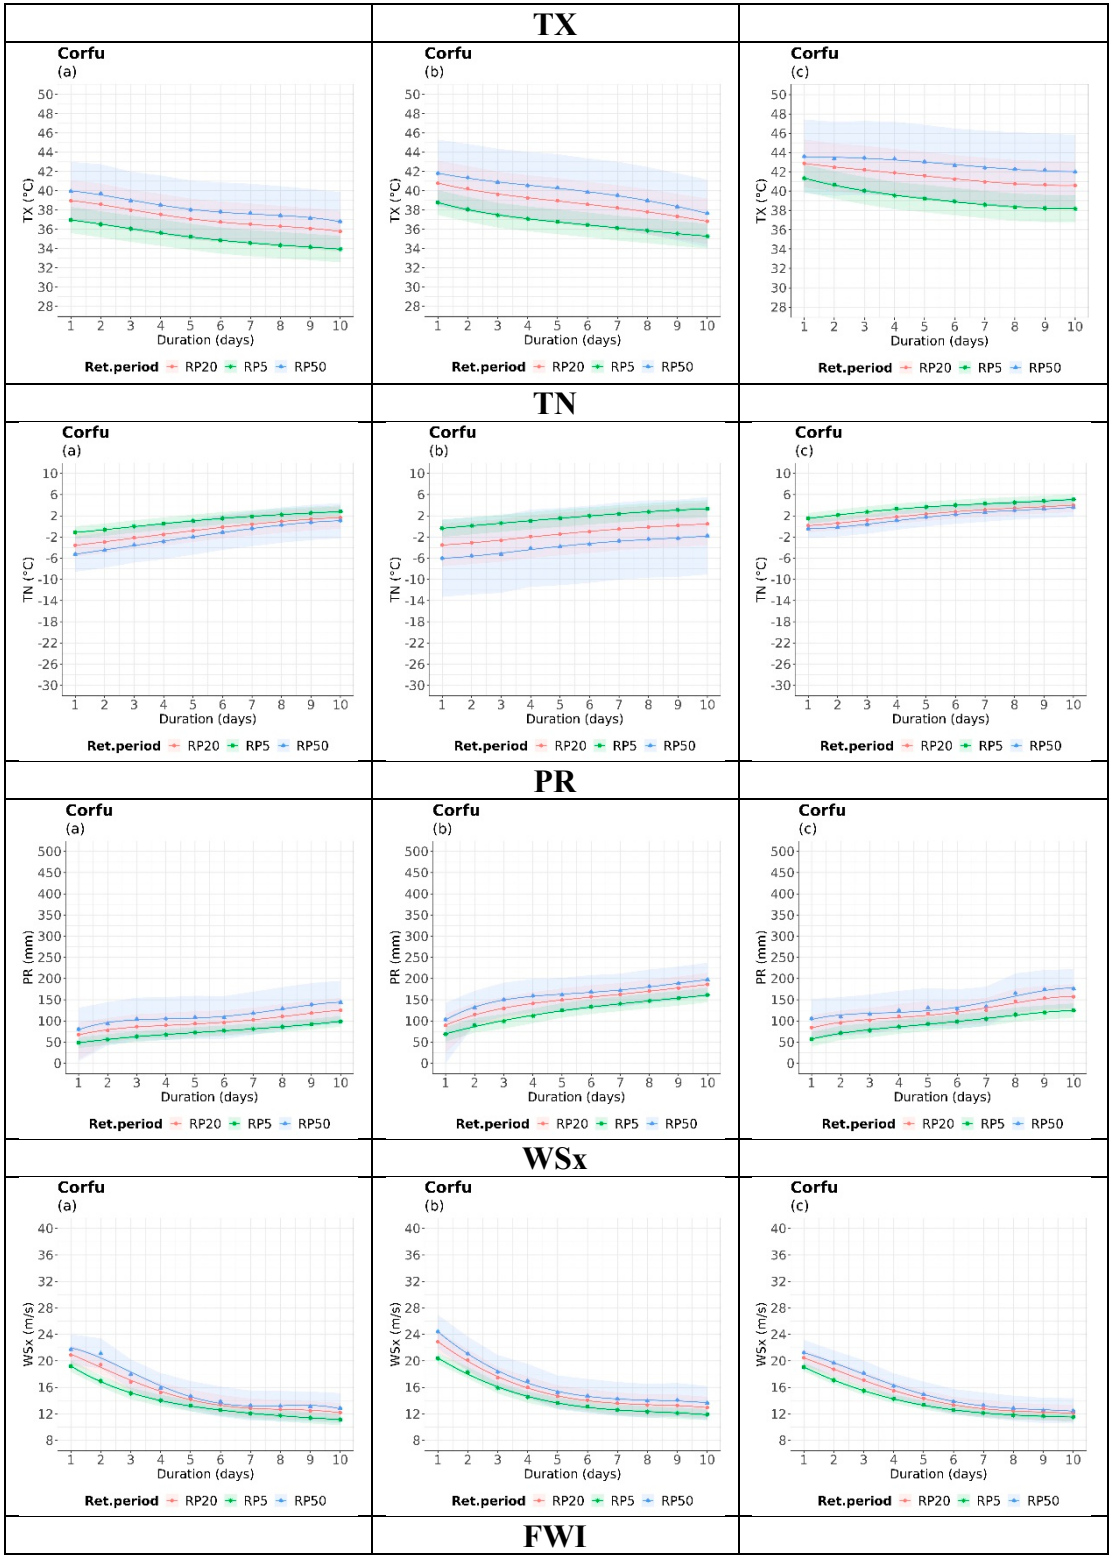

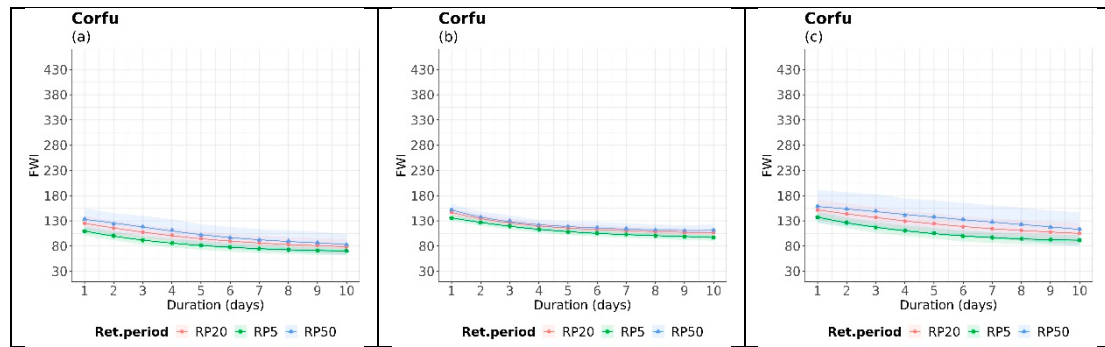

Figure S.2 Intensity-duration return period curves of the examined variables for 5,20 and 50 return periods, during a) the historical period (1980-2004), b) near future period 2025-2049 and c) far future 2075-2099 for Corfu.

Case study of Kastoria

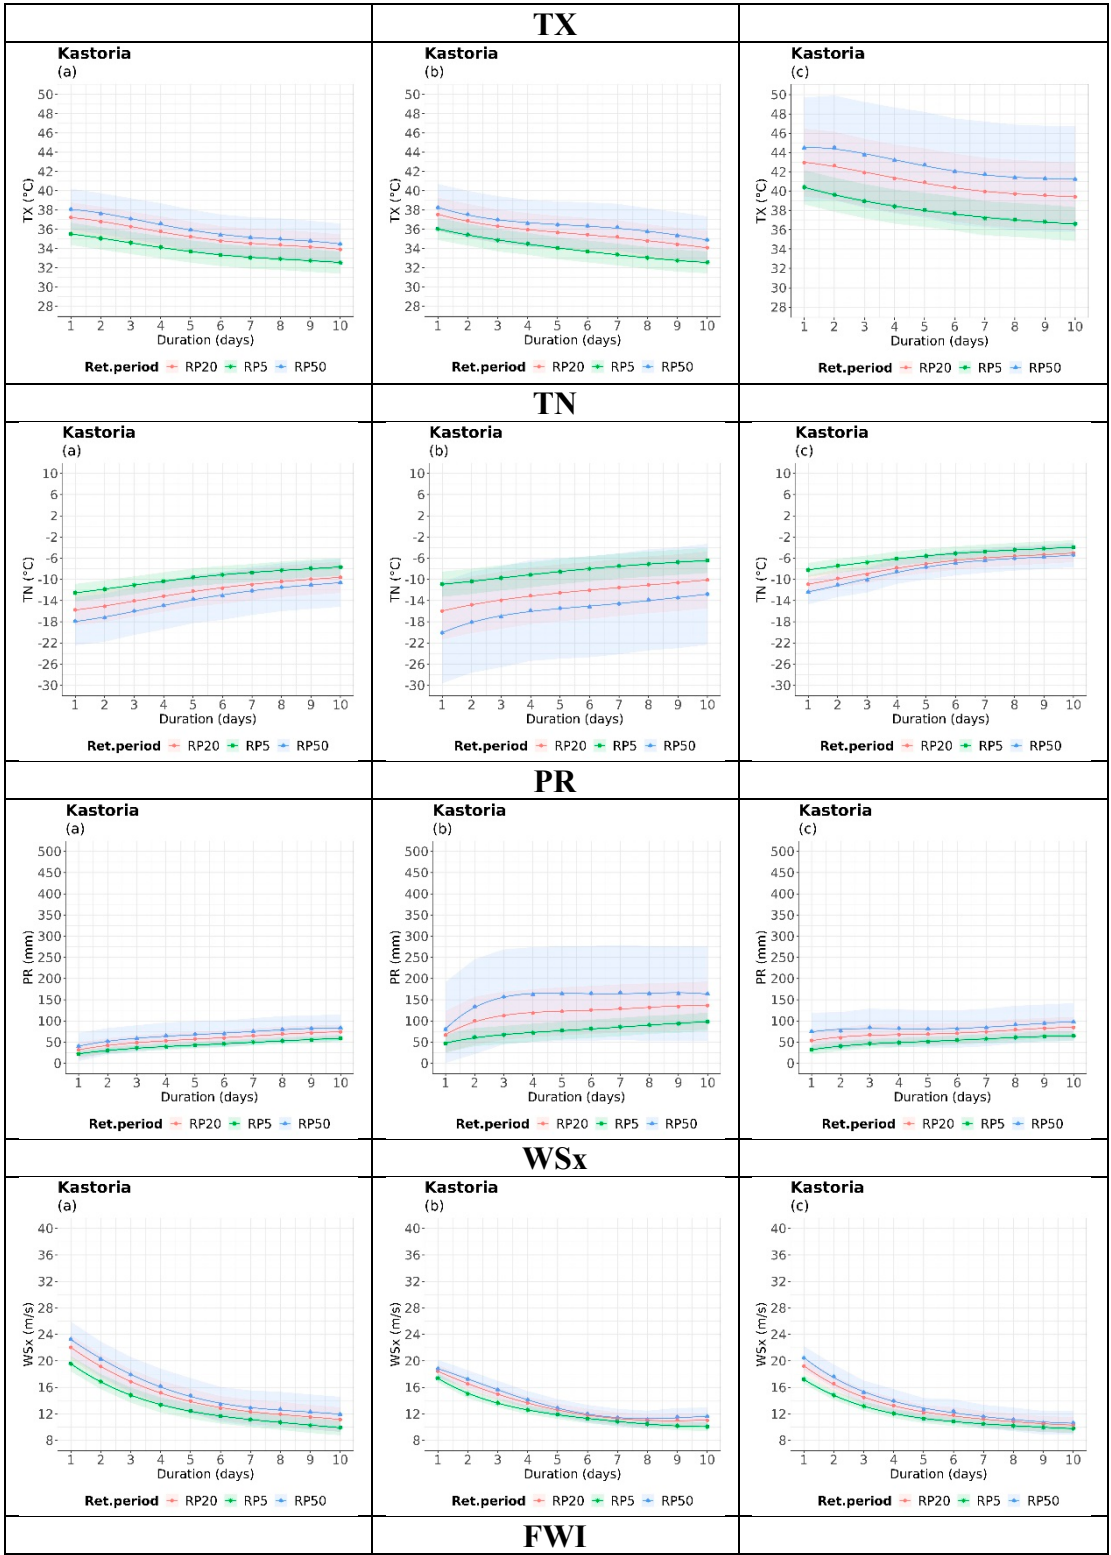

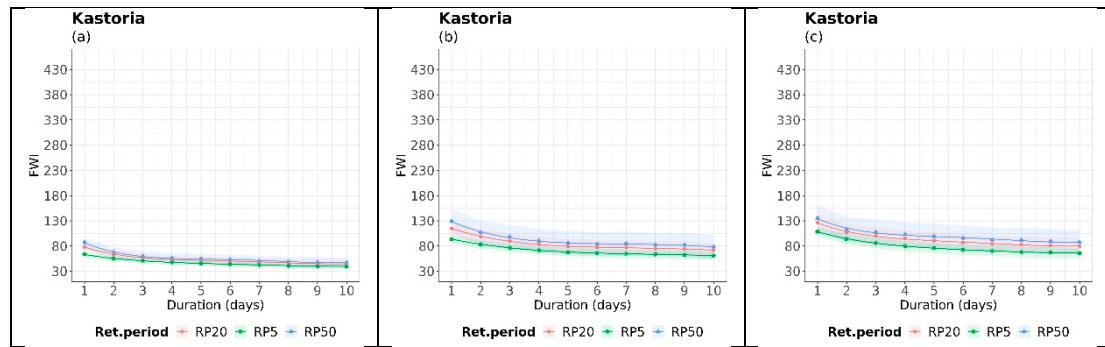

Figure S.3 Intensity-duration return period curves of the examined variables for 5,20 and 50 return periods, during the a) historical period (1980-2004), b) near future period 2025-2049 and c) far future 2075-2099 for Kastoria.

Case study of Elliniko

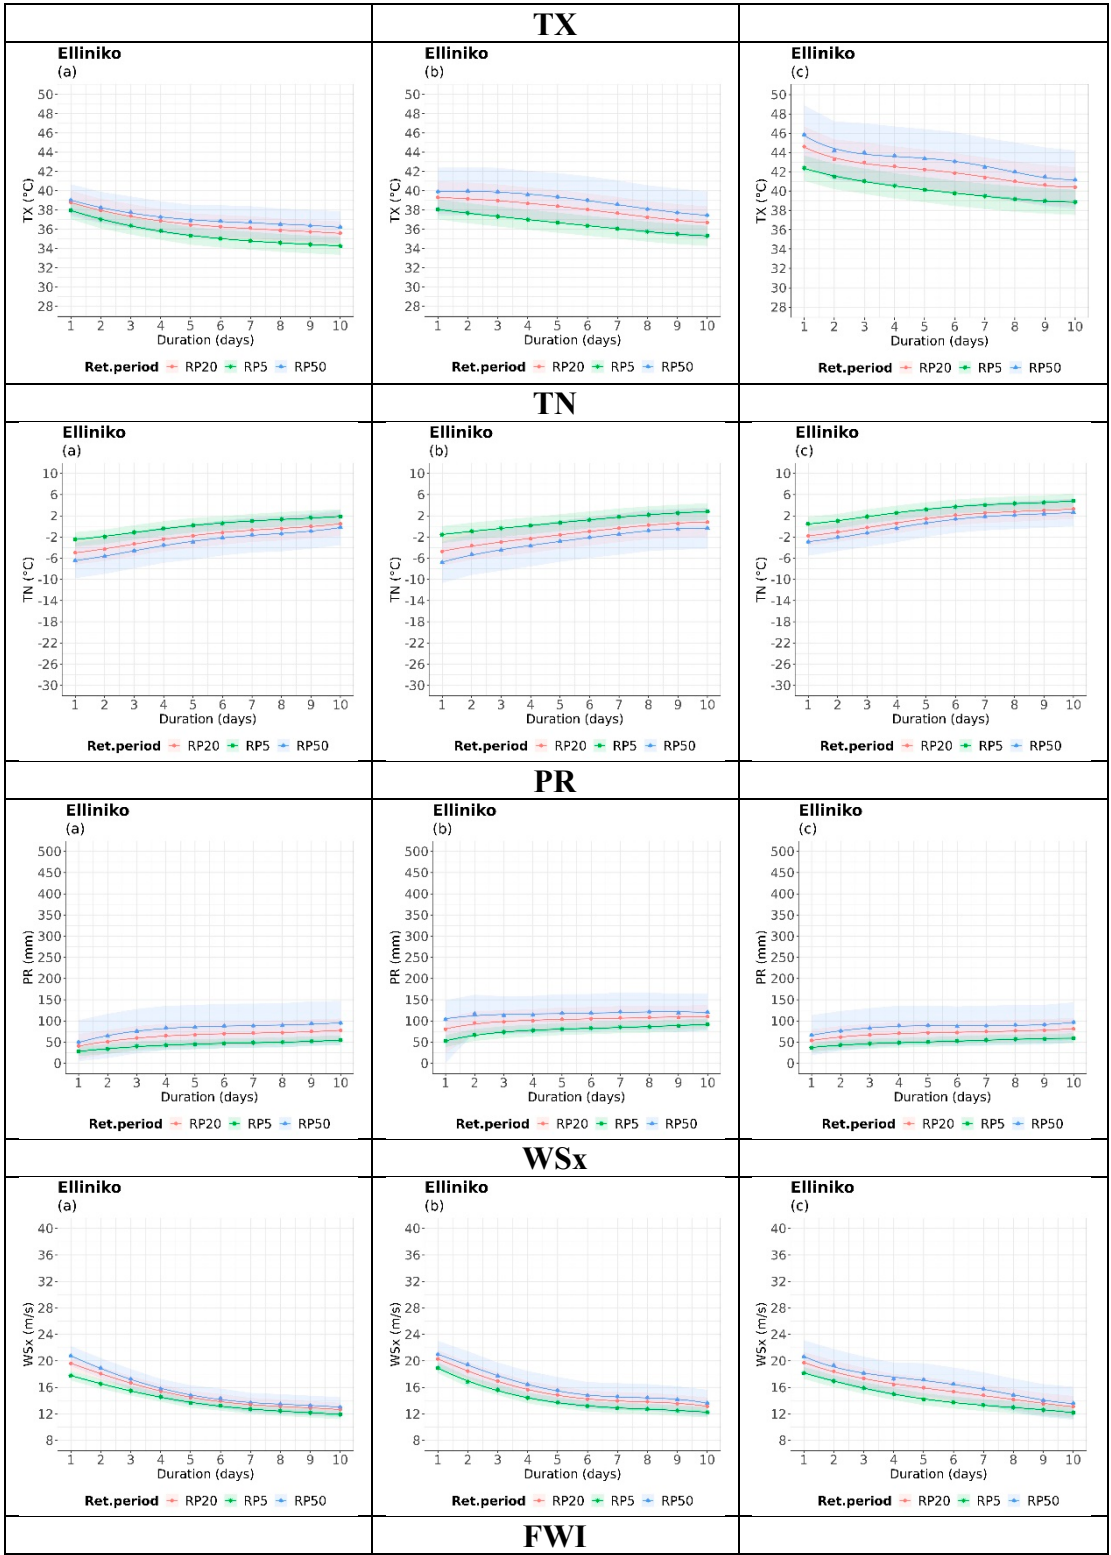

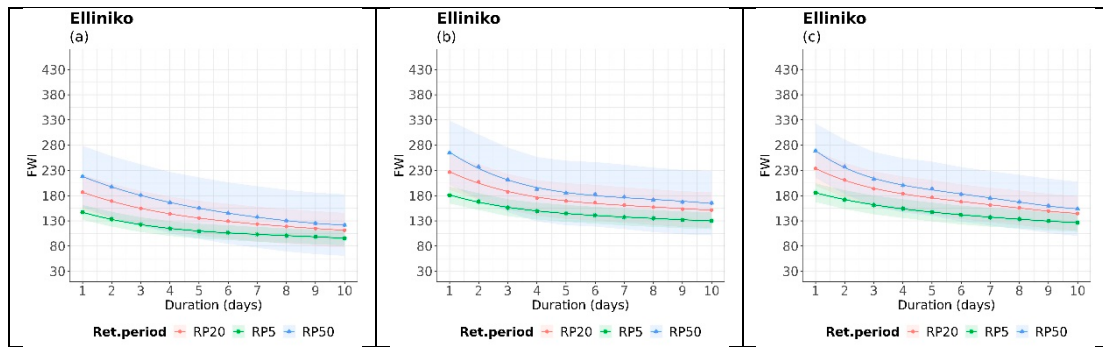

Figure S.4 Intensity-duration return period curves of the examined variables for 5,20 and 50 return periods, during the a) historical period (1980-2004), b) near future period 2025-2049 and c) far future 2075-2099 for Elliniko.



Case study of Larissa

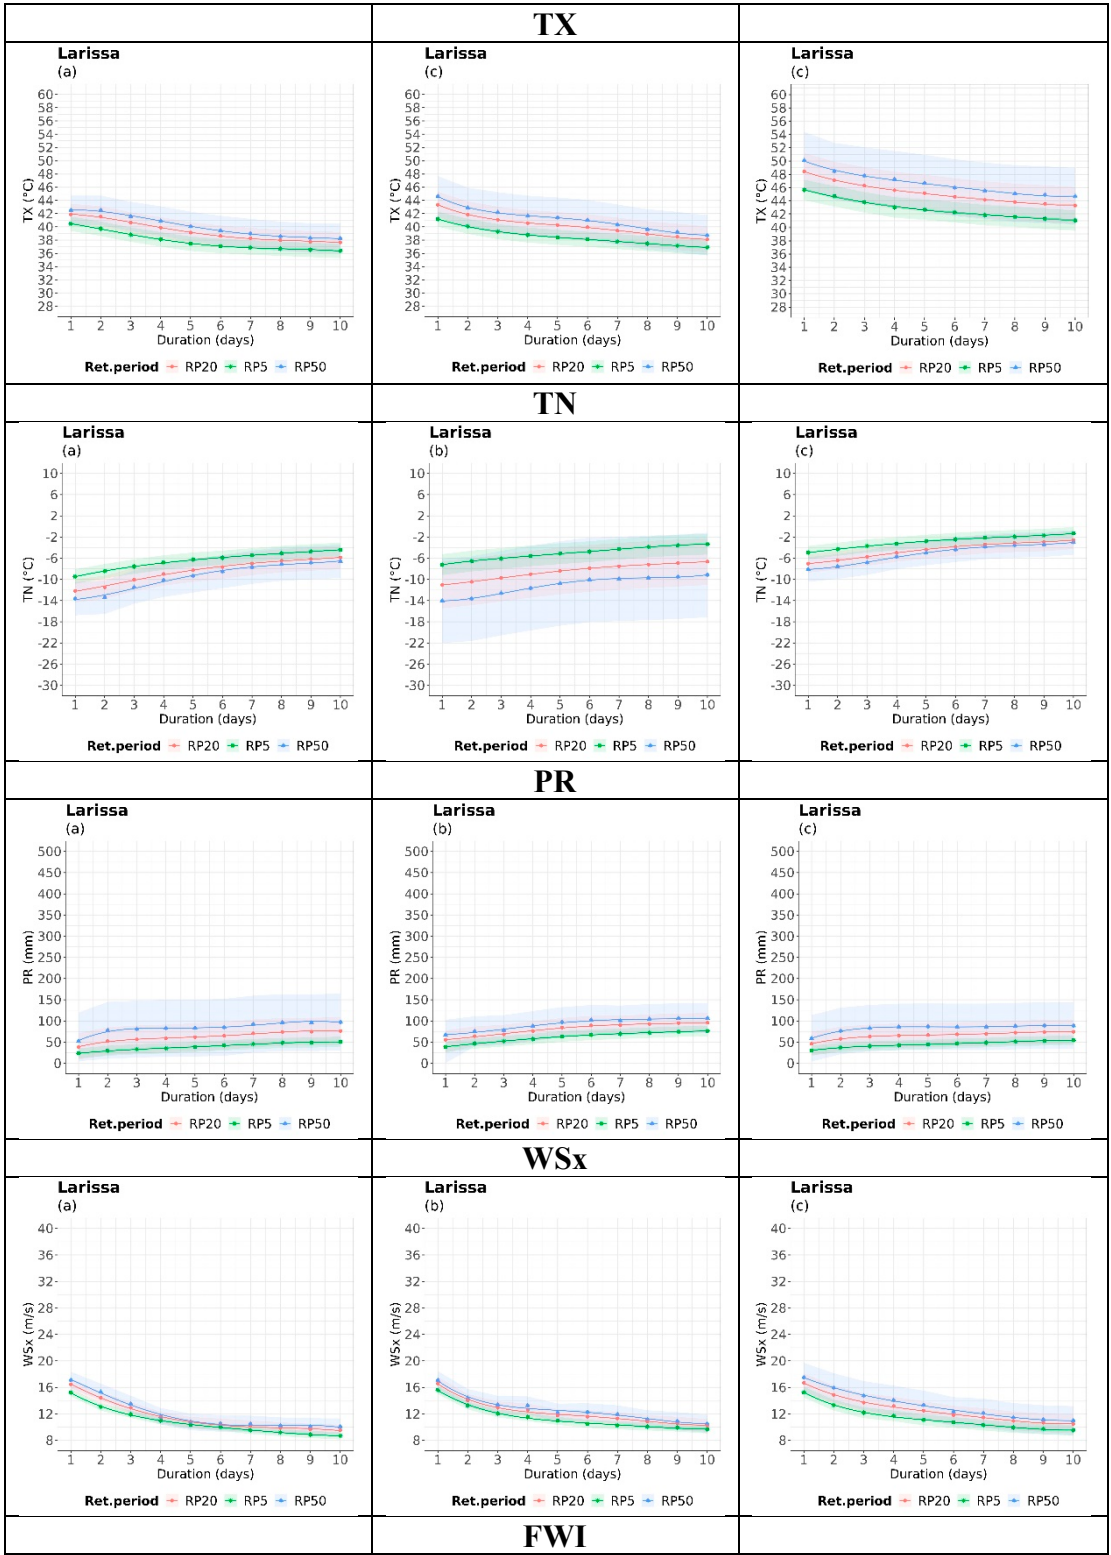

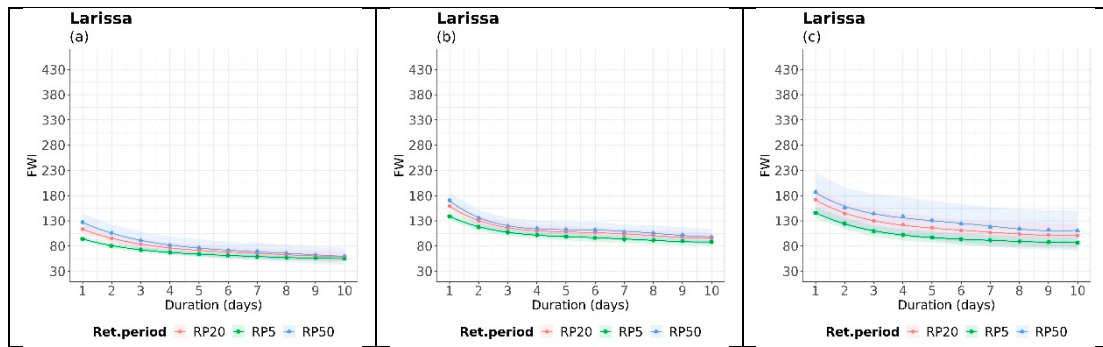

Figure S.5 Intensity-duration return period curves of the examined variables for 5,20 and 50 return periods, during the a) historical period (1980-2004), b) near future period 2025-2049 and c) far future 2075-2099 for Larissa.

Case study of Methoni

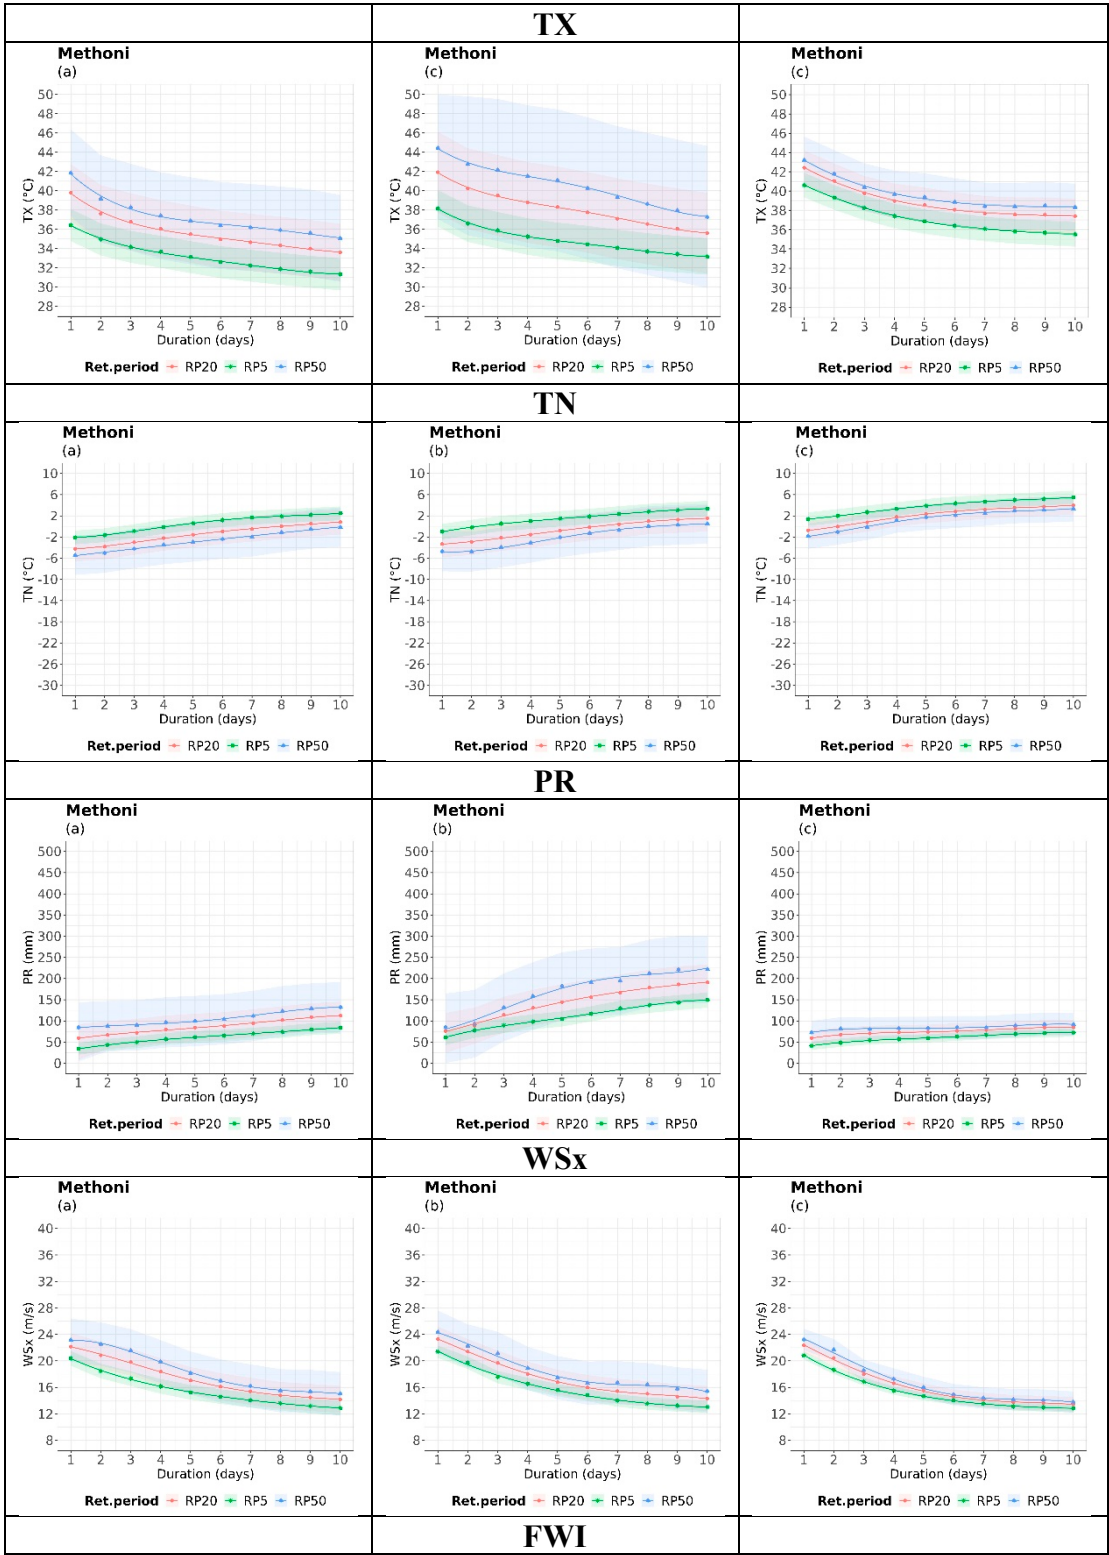

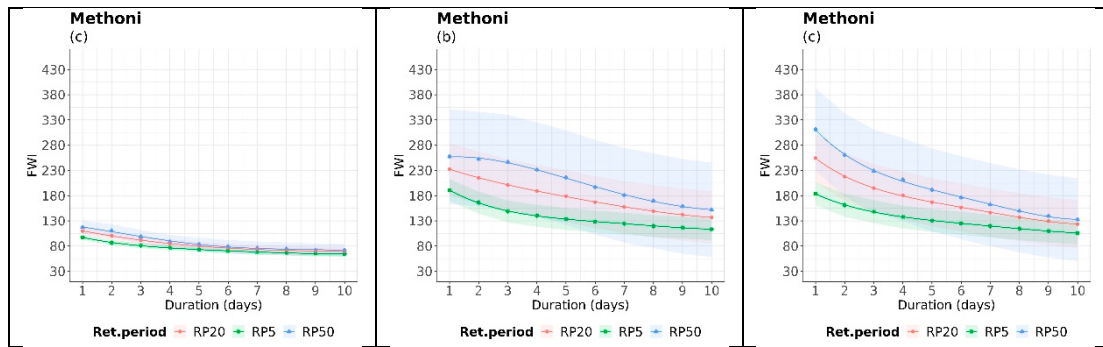

Figure S.6 Intensity-duration return period curves of the examined variables for 5,20 and 50 return periods, during the a) historical period (1980-2004), b) near future period 2025-2049 and c) far future 2075-2099 for Methoni.

Case study of Naxos

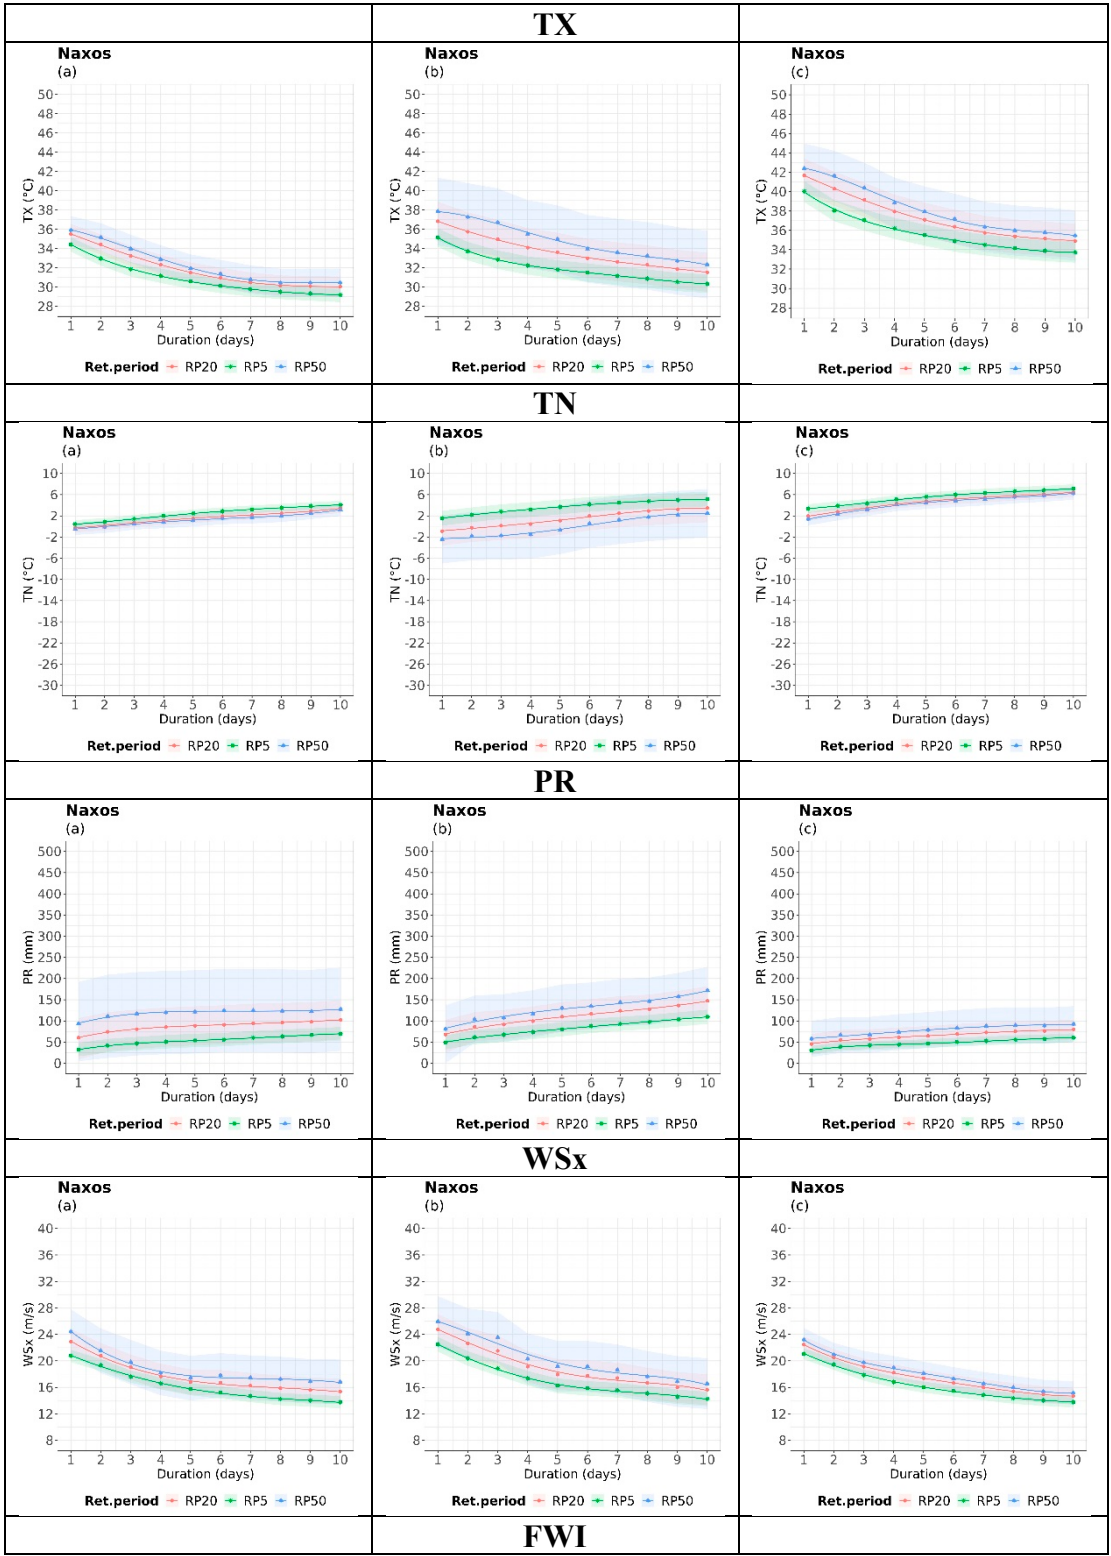

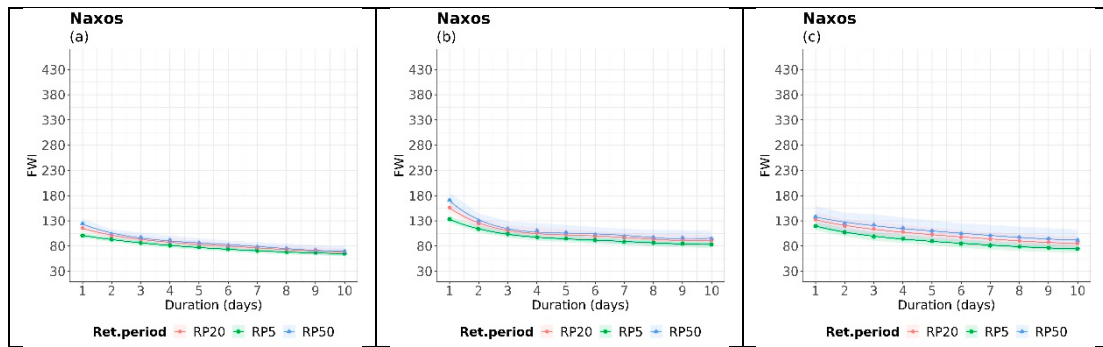

Figure S.7 Intensity-duration return period curves of the examined variables for 5,20 and 50 return periods, during the a) historical period (1980-2004), b) near future period 2025-2049 and c) far future 2075-2099 for Naxos.
